# Supplementary material for: Minimally invasive mitral valve surgery: a systematic safety analysis
Source: PubMed Central journal article supplement — Open Heart. 2020 Oct 12;7(2):e001393. doi: 10.1136/openhrt-2020-001393 (PMC7552840; doi:10.1136/openhrt-2020-001393), 2020-10-12
Supplement: openhrt-2020-001393supp001.pdf [file openhrt-2020-001393supp001.pdf]

| Addendum table. Univariate predictors for complications |                     |         |                     |         |                     |         |
|---------------------------------------------------------|---------------------|---------|---------------------|---------|---------------------|---------|
| Risk factor                                             | All complications   |         | Major complications |         | Minor complications |         |
|                                                         | OR (95% CI)         | p-value | OR (95% CI)         | p-value | OR (95% CI)         | p-value |
| Age > 70 years                                          | 3.34 (2.41 - 4.64)  | 0.000   | 1.64 (1.06 - 2.54)  | 0.027   | 3.38 (2.44 - 4.68)  | 0.000   |
| Age, per increase 1 year                                | 1.05 (1.03 - 1.06)  | 0.000   | 1.03 (1.01 - 1.04)  | 0.009   | 1.04 (1.03 - 1.06)  | 0.000   |
| BMI >35 kg/m <sup>2</sup>                               | 1.13 (0.46 - 2.76)  | 0.791   | 1.74 (0.57 - 5.32)  | 0.325   | 1.18 (0.48 - 2.88)  | 0.717   |
| Female sex                                              | 1.88 (1.4 - 2.53)   | 0.000   | 1.29 (0.84 - 1.99)  | 0.241   | 1.86 (1.39 - 2.49)  | 0.000   |
| Diabetes mellitus                                       | 1.34 (0.7 - 2.59)   | 0.376   | 1.01 (0.38 - 2.64)  | 0.989   | 1.41 (0.73 - 2.71)  | 0.307   |
| Atrial fibrillation                                     | 1.13 (0.84 - 1.53)  | 0.416   | 1.13 (0.72 - 1.75)  | 0.597   | 1.13 (0.84 - 1.52)  | 0.423   |
| Peripheral vascular disease                             | 4.65 (0.54 - 39.97) | 0.124   | 1.37 (0.16 - 11.87) | 0.773   | 4.85 (0.56 - 41.74) | 0.112   |
| Stroke                                                  | 1.54 (0.78 - 3.05)  | 0.208   | 1.07 (0.41 - 2.82)  | 0.887   | 1.62 (0.82 - 3.19)  | 0.164   |
| Transient ischemic attack                               | 1.29 (0.62 - 2.67)  | 0.496   | 1.33 (0.5 - 3.56)   | 0.565   | 1.40 (0.92 - 2.12)  | 0.117   |
| Endocarditis, active or healed                          | 0.77 (0.34 - 1.75)  | 0.533   | 0.98 (0.29 - 3.34)  | 0.970   | 0.81 (0.36 - 1.83)  | 0.606   |
| COPD, per increase 1 GOLD classification                | 1.21 (0.92 - 1.6)   | 0.181   | 1.23 (0.88 - 1.73)  | 0.225   | 1.24 (0.93 - 1.63)  | 0.138   |
| eGFR < 60 ml/min/1.73m <sup>2</sup>                     | 3.29 (2.12 - 5.12)  | 0.000   | 2.53 (1.26 - 3.46)  | 0.004   | 3.14 (2.03 - 4.84)  | 0.000   |
| Left ventricular ejection fraction < 50%                | 1.39 (0.91 - 2.11)  | 0.123   | 1.91 (1.12 - 3.27)  | 0.016   | 1.4 (0.92 - 2.12)   | 0.117   |
| Reduced right ventricular function                      | 1.23 (0.42 - 3.58)  | 0.702   | 1.14 (0.25 - 5.19)  | 0.862   | 1.29 (0.44 - 3.75)  | 0.643   |
| Pulmonary hypertension                                  | 1.56 (1.14 - 2.12)  | 0.005   | 1.25 (0.79 - 1.96)  | 0.341   | 1.63 (1.2 - 2.22)   | 0.002   |
| Valve etiology, reference = degenerative                |                     | 0.061   |                     | 0.452   |                     | 0.060   |
| Rheumatic                                               | 2.03 (1.15 - 3.57)  | 0.014   | 1.17 (0.53 - 2.58)  | 0.698   | 1.97 (1.13 - 3.45)  | 0.017   |
| Infective                                               | 1.87 (0.62 - 5.67)  | 0.265   | 2.03 (0.55 - 7.48)  | 0.286   | 1.96 (0.65 - 5.92)  | 0.233   |
| functional                                              | 1.37 (0.93 - 2.03)  | 0.116   | 1.25 (0.71 - 2.20)  | 0.431   | 1.39 (0.94 - 2.05)  | 0.102   |
| Post radiation                                          | 2.08 (0.38 - 11.47) | 0.399   | 3.73 (0.67 - 20.76) | 0.133   | 2.18 (0.4 - 11.99)  | 0.371   |
| Mitral valve replacement                                | 2.51 (1.82 - 3.47)  | 0.000   | 1.75 (1.13 - 2.71)  | 0.012   | 2.54 (1.84 - 3.50)  | 0.000   |
